# Supplementary material for: A unique new multiband molecular conductor: [BDTA][Ni(dmit)2]2
Source: Royal Society of Chemistry journal article supplement (doi:10.1039/b502783g), 2005-01-01
Supplement: b502783g.pdf [file b502783g.pdf]

## A Unique New Multiband Molecular Conductor: [BDTA][Ni(dmit)<sub>2</sub>]<sub>2</sub>

Sarah S. Staniland, Wataru Fujita, Yoshikatsu Umezono, Kunio Awaga, Stewart J. Clark, HengBo Cui, Hayao Kobayashi and Neil Robertson\*

**Supplementary Information:**  
**Experimental conductivity and magnetic data. Calculated HOMO and LUMO**

**Conductivity Data over the temperature range 80 – 200 K measured on a compressed pellet using a four-probe d.c. method.**

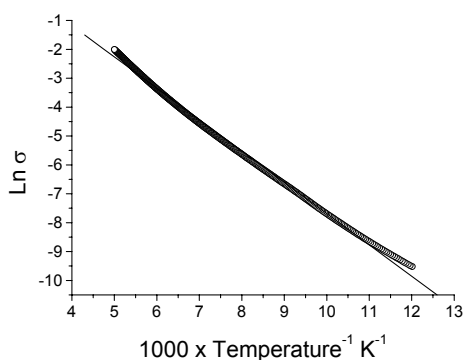

**Magnetic Susceptibility Data** and fit to a combination of a Curie model and a 1-D antiferromagnetic Heisenberg spin ½ chain (solid red line).

Magnetic susceptibility measurements were performed on a microcrystalline sample of [BDTA][Ni(dmit)<sub>2</sub>]<sub>2</sub> from 300K-2K in a field of 0.1 T using a Quantum design MPMS<sub>2</sub> SQUID magnetometer with MPMS MultiVu Application software to process the data. The sample was found to have linear field dependence between 0 and 5 T.

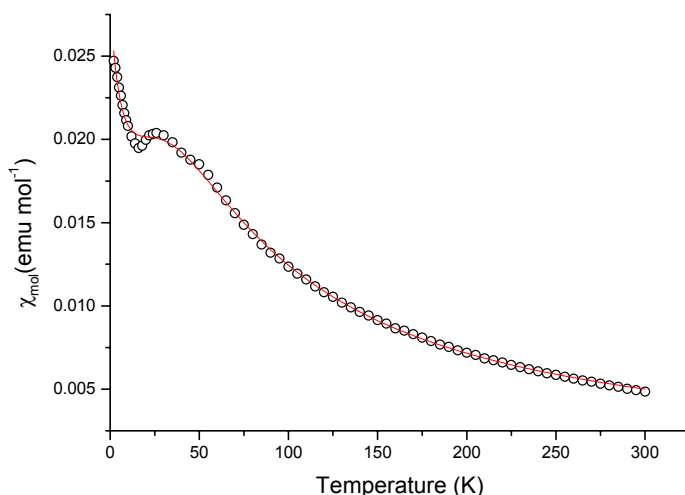

**Frontier Orbitals from the DFT plane wave calculation**

HOMO – based on BDTA

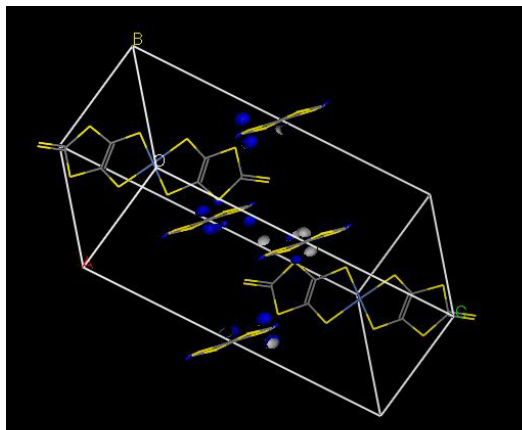

LUMO – based on  $[\text{Ni}(\text{dmit})_2]$

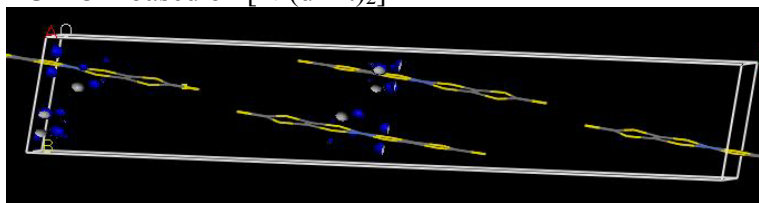

**Least Squares Plane Functions**

$[\text{Ni}(\text{dmit})_2]$ , (-0.7478, -6.2837, 2.4806)  
BDTA, (3.5955, -6.4802, 11.1236)

Supplementary Material for Chemical Communications  
This journal is © The Royal Society of Chemistry 2005
